# Supplementary material
Source: publisher figshare collection journal article supplement (https://acs.figshare.com/ndownloader/files/3896356)
Supplement: Supplementary file 1 [file 3896356]

# Manipulating Dispersion and Distribution of Graphene in PLA through Novel Interface Engineering for Improved Conductive Properties

Yu Fu,<sup>1</sup> Linshu Liu,<sup>2</sup> Jinwen Zhang<sup>1\*</sup>

<sup>1</sup>School of Mechanical and Materials Engineering, Composite Materials and Engineering Center, Washington State University, Pullman, Washington 99164, United States

E-mail: [jwzhang@wsu.edu](mailto:jwzhang@wsu.edu) Fax: +11-509-335-5077 Tel: +11-509- 335-8723

<sup>2</sup>Eastern Regional Research Center, Agricultural Research Service, U.S. Department of Agriculture, 600 East Mermaid Lane, Wyndmoor, Pennsylvania 19038, United States

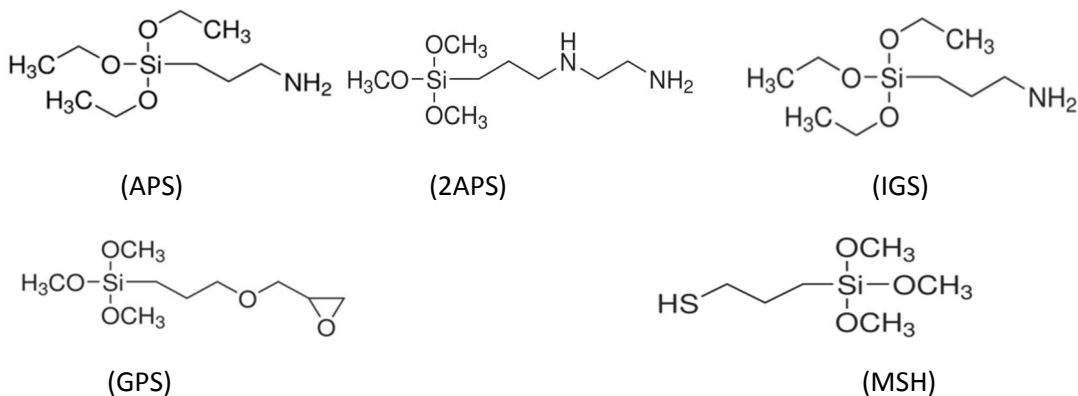

**Scheme 1** Chemical structures of silane agents used.

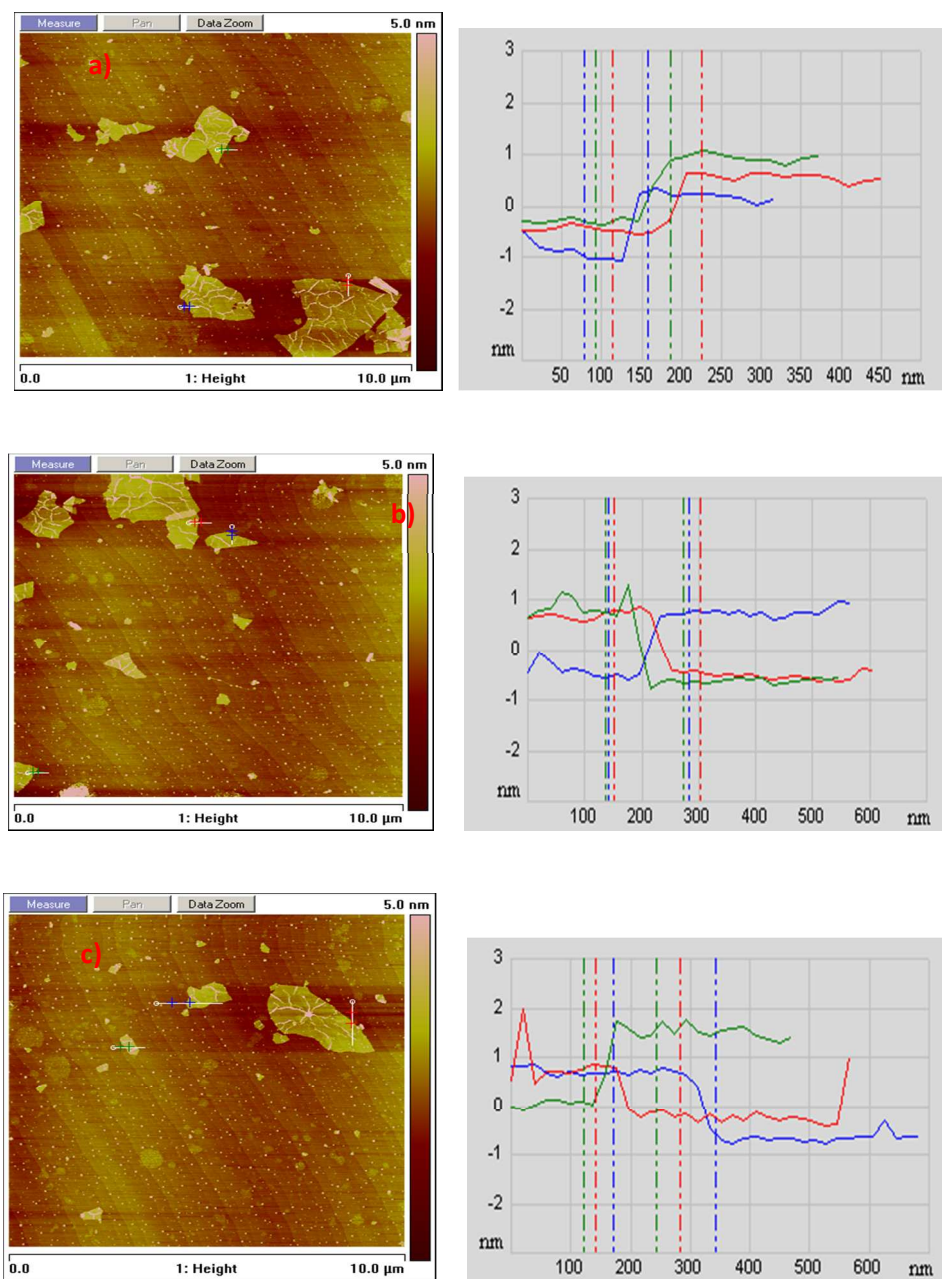

**Fig. 1** AFM morphology of GO a), GO-APS b), and GO-MSH c) and their corresponding height profiles.

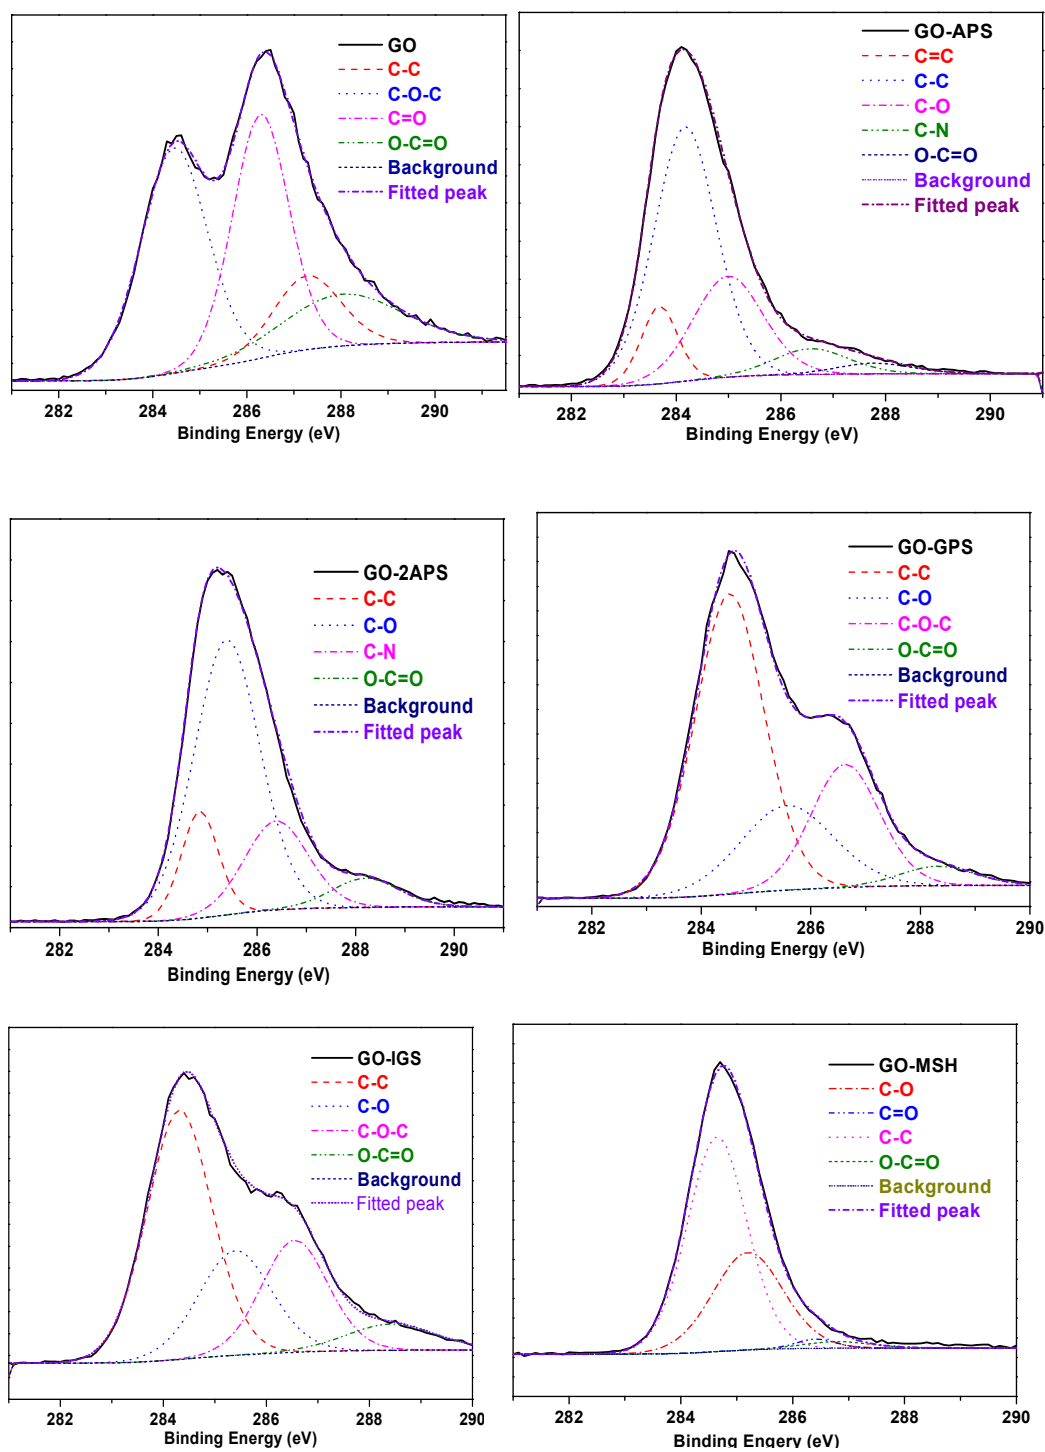

**Fig. 2** Deconvolution of the C1s peak of the XPS spectra of GO and f-GO.

The location and dispersion state of the nanofillers at the thermodynamic equilibrium can first be predicted by the value of the wetting parameter ( $\omega$ ), which is defined as follows:<sup>1</sup>

$$\omega = \frac{\gamma_{fGO-PLA} - \gamma_{fGO-Rubber}}{\gamma_{PLA-Rubber}} \quad (1)$$

where  $\gamma_{PLA-Rubber}$  is the interfacial energy between the PLA and rubber (EBA-GMA) phases, and  $\gamma_{fGO-p}$  is the interfacial energy between *f*-GO and the polymer component - PLA or rubber. If  $\omega > 1$ , *f*-GO will mainly reside in the rubber phase; if  $\omega < -1$ , *f*-GO will be dispersed in the PLA phase; and if  $-1 < \omega < 1$ , *f*-GO will be concentrated at the interface. Because it is not easy to obtain the interfacial energy between different components directly, the Girifalco-Good (geometric mean method) equation is usually used:<sup>1</sup>

$$\gamma_{ij} = \gamma_i + \gamma_j - 2\sqrt{\gamma_i \gamma_j} \quad (2)$$

where  $\gamma_i$  and  $\gamma_j$  are the surface energies of the *i* and *j* components.<sup>2,3,4</sup> Thus, by applying the Owens and Wendt equation the surface energies of PLA and rubber can be first determined:

$$\gamma_L (1 + \cos \theta) = 2\sqrt{\gamma_i^d \gamma_L^d} + 2\sqrt{\gamma_i^p \gamma_L^p} \quad (3)$$

where  $\gamma_L$  is the surface tension of the probe liquids used (**Table 1**),  $\theta$  the average static contact angles,  $\gamma_i^d$  and  $\gamma_i^p$  the nonpolar and polar parts of  $\gamma_i$ , respectively, and  $\gamma_i = \gamma_i^d + \gamma_i^p$  the total surface energy of the polymers (**Table 2**).<sup>5</sup>

The total surface energy values of PLA and rubber at room temperature were found to be 31.74 and 22.35 mJ/m<sup>2</sup>, respectively. These values are close to those reported in literature.<sup>6,7</sup> The surface energy values of the *f*-GO were also determined using the same method. To achieve the surface energies of PLA and rubber at the processing temperature (180°C), the relation  $\frac{d\gamma}{dT} = -0.06$  mJ/K was applied as an approximation.<sup>8,9</sup> **Table 2** gives the surface energy values of the corresponding components.

According to Eq. (1), the wetting parameters can be calculated and then the location of the *f*-GO at thermodynamic equilibrium can also be predicted in the blend matrix. The results are presented in **Table 3**. It predicted that the *f*-GO would mainly reside in the PLA phase. This is theoretically reasonable because the nanofillers prefer to disperse in the melt phase with lower viscosity. Actually, other factors such as kinetic effect of processing might also play certain roles in determining the selective location of the nanofillers.

**Table 1** Probe liquids used in the experiment

| Probe liquids | $\gamma^T$ (mJ/m <sup>2</sup> ) | $\gamma^d$ (mJ/m <sup>2</sup> ) | $\gamma^p$ (mJ/m <sup>2</sup> ) |
|---------------|---------------------------------|---------------------------------|---------------------------------|
| Diiodomethane | 50.8                            | 50.8                            | 0                               |
| Formamide     | 58.0                            | 39.0                            | 19.0                            |

Where superscript *T*, *d*, and *p* refer to total, dispersive part, polar part of surface energy.

**Table 2** Contact angles and surface energies of the corresponding components in the resulting nanocomposites

| Contact angles<br>(o) | PLA        | EBAGMA     | GO         | GO-APS     | GO-MSH     |
|-----------------------|------------|------------|------------|------------|------------|
| $\gamma^T$            |            |            |            |            |            |
| Diiodomethane         | 55.2 (1.2) | 72.5 (1.8) | 35.0 (0.6) | 61.9 (1.9) | 36.7 (0.3) |

|                                              |            |            |            |            |            |
|----------------------------------------------|------------|------------|------------|------------|------------|
| Formamide                                    | 72.3 (1.5) | 82.1 (1.3) | 20.1 (0.8) | 65.2 (0.4) | 40.1 (1.2) |
| $\gamma^T$ (mJ/m <sup>2</sup> )              | 31.74      | 22.35      | 55.08      | 31.22      | 47.7       |
| $\gamma^T$ at 180 °C<br>(mJ/m <sup>2</sup> ) | 22.44      | 13.05      |            |            |            |

Where superscript  $T$ ,  $d$ , and  $p$  refer to total, dispersive part, polar part of surface energy.

**Table 3** Calculation of interfacial energy and  $\omega$

| $\gamma_{ij}^T$    | EBAGMA | GO    | GO-APS | GO-MSH |
|--------------------|--------|-------|--------|--------|
| PLA                | 1.27   | 7.21  | 0.72   | 4.71   |
| EBAGMA             |        | 14.51 | 3.9    | 10.85  |
| $\omega$           |        | -5.75 | -2.50  | -4.84  |
| Predicted location |        | PLA   | PLA    | PLA    |

Where superscript  $T$ ,  $d$ , and  $p$  refer to total, dispersive part, polar part of surface energy.

Water contact angle is used to further investigate wettability of the resulting nanocomposites. If a water droplet rests on a solid surface and spreads to form a small contact angle, it indicates that the solid substrate is wetted by water and has a hydrophilic characteristic. **Fig. 3** shows the water droplet easily rested on the GO nanocomposite surface with a smaller contact angle compared with the  $f$ -GO nanocomposite surfaces. The static aqueous contact angle of 53° suggested that the GO nanocomposite had a hydrophilic surface. In contrast, GO-APS and GO-MSH were less hydrophilic, showing static aqueous contact angles of 83° and 66°, respectively. The higher hydrophilicity of GO was due to the presence of more polar oxygen-containing groups in GO. The contact angles from the organic solvent also gave the same tendency as those of water contact angles.

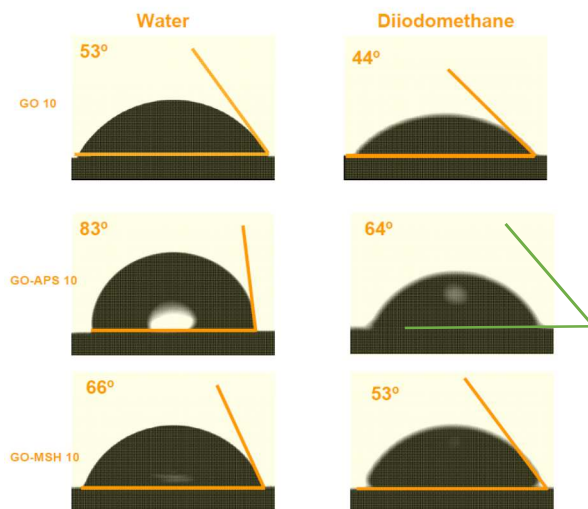

**Fig. 3** The static contact angles of water and diiodomethane on the *f*-GO nanocomposite sheet surfaces.

## References

- (1) Wu, S. *Polymer interface and adhesion*, 1<sup>st</sup> ed. Marcel Dekker, Inc.: New York, **1982**.
- (2) Elias, L.; Fenouillot, F.; Majesté, J. C.; Martin, G.; Cassagnau, P. Migration of Nanosilica Particles in Polymer Blends. *J. Polym. Sci., Part B: Polym. Phys.* **2008**, *46*, 1976-1983.
- (3) Lewin, M.; Mey - Marom, A.; Frank, R. Surface Free Energies of Polymeric Materials, Additives and Minerals. *Polym. Adv. Technol.* **2005**, *16*, 429-441.
- (4) Thareja, P.; Velankar, S. S. Interfacial activity of particles at PI/PDMS and PI/PIB Interfaces: Analysis Based on Girifalco–Good Theory. *Colloid. Polym. Sci.* **2008**, *286*, 1257-1264.
- (5) Owens, D. K.; Wendt, R. Estimation of the Surface Free Energy of Polymers. *J. Appl. Polym. Sci.* **1969**, *13*, 1741-1747.

- (6) Biresaw, G.; Carriere, C. Interfacial Tension of Poly (lactic acid)/Polystyrene Blends. *J. Polym. Sci., Part B: Polym. Phys.* **2001**, *39*, 920-930.
- (7) Ho, C.; Khew, M. Low Glass Transition Temperature (T<sub>g</sub>) Rubber Latex Film Formation Studied by Atomic Force Microscopy. *Langmuir* **2000**, *16*, 2436-2449.
- (8) Guggenheim, E. A. The Principle of Corresponding States. *J. Chem. Phys* **1945**, *13*, 253.
- (9) Katada, A.; Buys, Y. F.; Tominaga, Y.; Asai, S.; Sumita, M. Relationship between Electrical Resistivity and Particle Dispersion State for Carbon Black Filled Poly (ethylene-co-vinyl acetate)/Poly (L-lactic acid) Blend. *Colloid. Polym. Sci.* **2005**, *284*, 134-141.
